1  
2  
3  
4  
5  
6  
7  
8  
9  
10  
11  
12  
13  
14  
15  
16  
17  
18  
19  
20  
21  
22  
23

# Pharmacokinetics of long-term low-dose oral rapamycin in four healthy middle-aged companion dogs

Short title: Long-term rapamycin pharmacokinetics in dogs

Jeremy B. Evans<sup>1\*</sup>, Ashley J Morrison<sup>1</sup>, Martin A. Javors<sup>2</sup>, Marisa Lopez-Cruzan<sup>2</sup>, Daniel E.L. Promislow<sup>3</sup>, Matt Kaeberlein<sup>3</sup>, Kate E. Creevy<sup>1</sup>

<sup>1</sup> Texas A&M College of Veterinary Medicine & Biomedical Sciences, Department of Small Animal Clinical Sciences, College Station, Texas

<sup>2</sup> Biological Psychiatry Analytical Labs, Department of Psychiatry & Behavioral Sciences, UT Health San Antonio, Texas

<sup>3</sup> University of Washington School of Medicine, Departments of Biology (Promislow) and Pathology (Promislow, Kaeberlein), Seattle, Washington

\*Corresponding Author

Email: [Jbevans12@tamu.edu](mailto:Jbevans12@tamu.edu)

## 24 **Abstract**

### 25 **Objective**

26 To determine the blood concentration and pharmacokinetic parameters of rapamycin in  
27 companion dogs following long-term, low-dose oral administration of rapamycin.

### 28 **Animals**

29 Four healthy, middle-aged, medium-to-large breed privately owned dogs participated.

### 30 **Procedures**

31 All dogs had been receiving oral rapamycin at a dose of 0.025 mg/kg on Monday, Wednesday,  
32 and Friday mornings for at least one month. An initial blood sample was collected prior to  
33 morning rapamycin administration, and samples were collected at 1, 2, 6, and 24 hours after  
34 rapamycin was given. Blood samples were transferred to blood spot collection cards, air-dried  
35 and stored at -80°C. Rapamycin concentrations were determined via HPLC/MS. All blood  
36 collections occurred on Wednesdays, so that the previous dose of rapamycin had taken place 48  
37 hours prior to blood collection.

### 38 **Results**

39 For all dogs, rapamycin  $T_{max}$  was 2 hours. Median  $C_{max}$  was 1.47 ng/ml (0.912 – 2.13), and the  
40 median  $AUC_{0-last}$  was 15.7 ng\*hr/mL (1.30 – 36.3). Due to sample size and timing, the only  
41 estimates related to elimination rate reported are for mean residence time with a median of 4.70  
42 hrs (0.90 – 7.30).

### 43 **Conclusions and Clinical Relevance**

44 A 0.025 mg/kg oral dose of rapamycin, administered three times a week, resulted in  
45 concentrations of rapamycin in the blood capable of being measured in ng/ml.

46 **Abbreviations**

47 HPLC/MS/MS – High performance liquid chromatography – mass spectroscopy

48

49 **Introduction**

50 Rapamycin (sirolimus), an FDA-approved natural macrolide that is produced by  
51 *Streptomyces hygroscopicus*, is an inhibitor of the mechanistic target of rapamycin (mTOR). As  
52 part of the phosphatidylinositol kinase-related kinase (PIKK) family, mTOR is a serine/threonine  
53 kinase that is present within the mTOR complex 1 (mTORC1) and mTOR complex 2  
54 (mTORC2). [1-3] The mTORC1 pathway is crucial for cell survival and drives cell growth and  
55 protein synthesis based in part on nutrient availability. In this regard, the activity of the  
56 nutrient/stress-sensing mTORC1 is increased during periods of nutrient abundance, and is  
57 conversely inhibited when under nutrient stress, such as reduced intracellular ATP or reduced  
58 amino acid availability. [1, 4-7] A similar inhibition of mTORC1 occurs under conditions of  
59 dietary restriction or intermittent fasting. [8] With rapamycin, inhibition of mTOR is due to the  
60 binding of rapamycin to the FK506 binding protein (FKBP12), which allosterically inhibits  
61 mTORC1. [9-11] This results in several downstream consequences including reduced translation  
62 of proteins that play a key role in the G1 to S transition of the cell cycle and activation of the  
63 autophagic degradation pathway. [1, 12, 13]

64 In humans, oral rapamycin is often used in immunosuppressive protocols in transplant  
65 recipients to prevent organ rejection.[14-16] In some cases, due to the mTOR pathway's close  
66 association with insulin signaling, rapamycin treatment has resulted in derangements in glucose  
67 homeostasis.[17, 18] However, multiple studies have documented potential benefits of  
68 rapamycin treatment in the context of normative aging. For instance, rapamycin-mediated

69 inhibition of mTORC1 has been shown to reduce age-related cancers [19, 20] and age-related  
70 declines in cognitive function [21, 22], and to improve heart function [23-25], immune function  
71 [26], kidney function [27], oral health [28, 29], intestinal function and gut dysbiosis [30, 31], and  
72 ovarian function [32] in aging mice. In both dogs and mice, rapamycin therapy improves cardiac  
73 function and can potentially treat hepatic glycogen storage disease.[4, 24, 25, 33-35] Inhibition  
74 of mTOR also results in decreased smooth-muscle cell migration and proliferation within  
75 coronary arteries, with rapamycin-coated coronary stents significantly reducing arterial stenosis  
76 following stent placement.[36] Still, one of the most striking findings is that rapamycin  
77 administration has been associated with a significant increase in subject lifespan, a result  
78 observed in multiple model organisms, including yeast [37], fruit flies [38], nematodes [39], and  
79 mice.[40-46]

80 In humans, oral rapamycin is absorbed rapidly with peak concentrations occurring within  
81 one to three hours depending on dosing protocol.[47, 48] In the bloodstream, the vast majority of  
82 rapamycin is distributed within red blood cells, and co-administration with a high fat meal can  
83 increase the oral bioavailability and AUC by up to 35% while decreasing the maximum blood  
84 concentration.[49, 50] In dogs, Larson *et al.* investigated rapamycin pharmacokinetics following  
85 a single oral dose of 0.1 mg/kg or a five-day course of this treatment.[51] In the single-dose  
86 protocol, rapamycin concentration peaked twice, at two- and six-hours post-administration, but  
87 this pattern was not noted when the dogs were treated on five consecutive days. These low-dose  
88 rapamycin treatments resulted in peak blood concentrations similar to those that displayed anti-  
89 tumorigenic properties in mice, with 8.39 ng/ml and 5.49 ng/ml measured in the single and  
90 consecutive dose protocols, respectively. In both instances, the time to reach maximum blood  
91 concentration was approximately three to four hours.[51] A different study found that

92 intramuscular injections of rapamycin doses ranging from 0.01-0.08 mg/kg, either given once or  
93 daily over a seven-day treatment schedule, also resulted in measurable and clinically relevant  
94 blood concentrations of rapamycin. However, the time to maximum blood concentration in this  
95 study ranged from 2 to 48 hours, implying significantly greater variability with this route.[52]  
96 The goal of the study reported here was to determine the pharmacokinetics of oral low-dose  
97 rapamycin after long-term administration (two to six months) to healthy middle-aged dogs.

98

## 99 **Materials and Methods**

### 100 **Study Participants**

101         Seven healthy, middle-aged to senior dogs (three spayed females, four castrated males)  
102 between the ages of six to ten years old and weighing between 18.2-36.4 kg (40-80 lbs) were  
103 enrolled. All participating dogs had previously been recruited based on specified criteria into a  
104 12-month prospective, double-blinded, placebo-controlled randomized clinical trial in which  
105 dogs received rapamycin or placebo three times per week for six months. Therefore, dogs in this  
106 ancillary study had been receiving treatment (either placebo or rapamycin) for durations ranging  
107 from one to six months based upon their date of enrollment into the clinical trial. At the time of  
108 this study, investigators remained masked to treatment assignment and collected blood samples  
109 from a total of seven dogs. Three of these dogs were later determined to have been in the placebo  
110 group, such that results from four rapamycin-treated dogs are reported here.

111

### 112 **Drug and placebo**

113 Both 0.5 mg tablets (Cadlia Health Care, Zydus, Ahmedabad, India) and 1.0 mg tablets  
114 (Dr. Reddy's Laboratories, Princeton, New Jersey; Greenstone LLC, Pfizer Inc.) of rapamycin  
115 were used. Rapamycin was administered to dogs at a dose of approximately 0.025 mg/kg, using  
116 0.25 mg increments. As such, the dose of rapamycin was 0.50 mg for dogs between 18.2 and  
117 23.0 kg (40-50 lbs), 0.75 mg for dogs between 23.1 and 30.0 kg (51-66 lbs), and 1.0 mg for dogs  
118 between 30.1 and 36.4 kg (67-80 lbs). To mask the treatment, a combination of tablets  
119 comprising the total daily dose was placed into gelatin capsules for dogs in the treatment group.  
120 Placebo capsules (Professional Compounding Centers of America; PCCA) contained lactose.

121

## 122 **Experimental design**

123 All dogs were fasted overnight and underwent an initial blood draw at hour 0.  
124 Approximately four ml of blood were obtained via jugular venipuncture at every time point.  
125 After the initial blood draw at 0 hour, dogs were offered their normal breakfast and given either  
126 placebo or rapamycin. Additional blood samples were obtained via the same method from each  
127 dog at 1, 2, 6, and 24 hours after treatment administration. All blood samples were promptly  
128 transferred to K-EDTA blood storage tubes. Within an hour of each time point, up to 50  $\mu$ L of  
129 whole blood were pipetted from the storage tube onto two spots of a blood spot card (Whatman  
130 903 DBS (dried blood spot) collection cards; MilliporeSigma, St. Louis, MO). Two spot cards  
131 with two spots each were prepared for each dog. The spot cards were allowed to dry at room  
132 temperature for one hour and stored at -80°C in a sealed plastic bag with a desiccant packet (0.5  
133 gram silica gel packets, Intertek Packaging, Orchard Park NY 14127) before being shipped for  
134 analysis.

135 All procedures for this study were reviewed and approved by the TAMU Institutional  
136 Animal Care and Use Committee (IACUC 2018-0299 CA). Because these were client-owned  
137 animals, an IRB determination was requested, and this study was found not to be Human  
138 Subjects Research (HSR).

139

## 140 **Analysis of Rapamycin Concentration**

### 141 **Measurement of Rapamycin Using HPLC/MS/MS**

142 Rapamycin concentrations were determined via HPLC/MS/MS (Biological Psychiatry  
143 Analytical Lab [BPAL], University of Texas Health Science, San Antonio, TX). Rapamycin,  
144 ascomycin and all reagents were purchased from Sigma Chemical Company (St. Louis, MO).  
145 Milli-Q water was used for preparation of all solutions. The HPLC system consisted of a  
146 Shimadzu SIL 20A HT autosampler, LC-20AD pumps (2), and an AB Sciex API 3200 tandem  
147 mass spectrometer with turbo ion spray. The LC analytical column was a Grace Alltima C18 (4.6  
148 x 150 mm, 5  $\mu$ m) purchased from Alltech (Deerfield, IL) and was maintained at 25°C during the  
149 chromatographic runs using a Shimadzu CT-20A column oven. Mobile phase A contained 10  
150 mM ammonium formate and 0.1% formic acid dissolved in 100% HPLC grade methanol. Mobile  
151 phase B contained 10 mM ammonium formate and 0.1% formic acid dissolved in 90% HPLC  
152 grade methanol. The flow rate of the mobile phase was 0.5 ml/min. Rapamycin was eluted with  
153 a gradient. Mobile phase gradient: 0-0.1 min, 100% B; 0.1-4 min, linear gradient to 0% B; 4.0-  
154 5.0, 0% B; 5-10 min, 100% B. The rapamycin transition was 931.6 m/z to 864.5 m/z, which was  
155 used for quantification. The internal standard (ascomycin) transition was 809.6 m/z to 756.6  
156 m/z.

157 Rapamycin and ascomycin super stock solutions were prepared in methanol at a  
158 concentration of 1 mg/ml and stored in aliquots at -80°C. A working stock solution was prepared  
159 each day from the super stock solution at a concentration of 10 µg/ml and used to spike the  
160 calibrators. Calibration samples were pipetted on spot cards, dried, and then used to quantify  
161 rapamycin in the unknown samples.

162 Spiked calibration samples were prepared at concentrations of 0, 1.56, 6.25, 25.0 and 100  
163 ng/ml. Two blood spots, each containing 50 µl, were cut into four segments and placed in 10 X  
164 50 mm polypropylene tubes with push caps. One ml of mobile phase A and 10 µl of a 0.5 µg/ml  
165 solution of ascomycin were added to each tube. The tubes were capped, vortexed vigorously for  
166 30 sec and placed on a shaker Model E6010 from Eberbach Corporation (Ann Arbor, Michigan)  
167 for 30 min. After shaking, the tubes were centrifuged for 10 min at 5,000 g. The supernatants  
168 were carefully poured or pipetted into 10 X 75 mm glass tubes and dried to residue under a  
169 nitrogen stream. The residues were then redissolved in 100 µl of mobile phase A and transferred  
170 to autosampler vials. Then, 50 µl were injected into the HPLC/MS/MS system. The ratios of  
171 rapamycin peak areas to ascomycin peak areas of unknown samples were compared against the  
172 linear regression of the ratios of the calibration samples to quantify rapamycin. The  
173 concentration of rapamycin was expressed as ng/ml of blood.

174

## 175 **Pharmacokinetic Analysis**

176 Noncompartmental analysis using industry standard software (Certera Phoenix  
177 WinNonLin 8.2.0.4383, Princeton, NJ) was attempted using the blood concentrations from  
178 individual dogs to estimate pharmacokinetic parameters. Attempts were made to estimate or  
179 calculate the following parameters:  $T_{max}$ : time of maximum observed blood concentration;  $C_{max}$ :



180 maximum observed blood concentration;  $\lambda_z$ : terminal elimination rate;  $t_{1/2\lambda_z}$ : apparent terminal  
181 half-life;  $AUC_{0-last}$ : area of the curve from time zero to last measurable time;  $AUC_{0-inf}$ : area under  
182 the curve from time zero extrapolated to infinite time; AUC % Extrap: area under the curve  
183 extrapolated from time zero to infinity as a percent of total AUC;  $AUMC_{0-obs}$  = area under the  
184 moment curve from time zero to last observed concentration;  $AUMC_{0-inf}$  = area under the  
185 moment curve from time zero extrapolated to infinity;  $MRT_{0-obs}$  = mean resident time estimated  
186 using time zero to last observed concentrations, calculated as  $AUMC_{0-obs} / AUC_{0-obs}$ ;  $MRT_{0-inf}$  =  
187 mean residence time estimated using time zero to infinity, calculated as  $AUMC_{0-inf} / AUC_{0-inf}$ .

188

## 189 **Results**

### 190 **Study Participants**

191 The participant demographics are displayed in Table 1. A total of seven dogs were  
192 sampled. Of these, four dogs (three spayed females, one castrated male) were found to be  
193 receiving rapamycin after the clinical trial was unblinded. There were three purebred (Labrador  
194 Retriever, Australian Shepherd, Pit Bull Terrier) and one mixed breed dog represented. The  
195 median age of this group of dogs was 9.0 years (range: 8.8 – 11 years) and they were all medium  
196 to large breeds (median weight: 27.0 kg, range: 20.2 – 34.0 kg). As dogs had been previously  
197 enrolled at different dates into the clinical trial, the treatment period prior to this study varied.  
198 The range of treatment period prior to this study was one to five months; two of the four dogs  
199 had been receiving treatment for one month. Each dog had been prescribed a dose of rapamycin  
200 according to its weight, with one dog receiving 0.50 mg, two dogs receiving 0.75 mg, and one  
201 dog receiving 1.0 mg. While all dogs were offered breakfast at the time of medication  
202 administration, only one dog (#4) ate.

203

204 **Table 1. Participant demographics.**

| <b>Dog #</b>   | <b>Age (years)</b> | <b>Breed</b>        | <b>Sex</b> | <b>Weight (kg)</b> | <b>Treatment</b>  | <b>Treatment Duration (months)</b> |
|----------------|--------------------|---------------------|------------|--------------------|-------------------|------------------------------------|
| 1              | 7.8                | Border Collie       | FS         | 19.0               | Placebo           | 5.0                                |
| 2              | 9.2                | Labrador Retriever  | MC         | 34.0               | 1.0 mg rapamycin  | 1.0                                |
| 3              | 8.8                | Australian Shepherd | FS         | 26.0               | 0.75 mg rapamycin | 1.0                                |
| 4 <sup>a</sup> | 9.8                | Pit bull terrier    | FS         | 28.0               | 0.75 mg rapamycin | 5.0                                |
| 5              | 10.8               | Australian Shepherd | MC         | 26.2               | Placebo           | 4.0                                |
| 6              | 11.0               | Mixed breed         | FS         | 20.2               | 0.50 mg rapamycin | 3.0                                |
| 7              | 8.5                | Border Collie       | MC         | 29.0               | Placebo           | 5.5                                |

205 <sup>a</sup>Only participant who received rapamycin with a meal

206

## 207 **Blood Rapamycin Concentrations**

208 All four dogs had received rapamycin approximately 48 hours prior to baseline collection  
209 for this study. No dogs had detectable levels of rapamycin in their blood at baseline (time 0), just  
210 prior to their next scheduled administration of rapamycin. No placebo dogs had detectable levels

211 of rapamycin in their blood at any time. Following administration of rapamycin, all four treated  
212 dogs (#2, 3, 4, and 6) had measurable rapamycin blood concentrations that were detectable by  
213 HPLC/MS/MS (Table 2).

214

215 **Table 2. Blood concentration of rapamycin (ng/ml) in four dogs following a 0.025 mg/kg**  
216 **oral dose of rapamycin.**

| <b>Time (hrs)</b> | <b>Dog #2</b> | <b>Dog #3</b> | <b>Dog #4</b> | <b>Dog #6</b> | <b>Median</b> |
|-------------------|---------------|---------------|---------------|---------------|---------------|
| <b>0</b>          | 0             | 0             | 0             | 0             | 0             |
| <b>1</b>          | 1.07          | 1.15          | 0.884         | 0.861         | 0.988         |
| <b>2</b>          | 1.08          | 1.86          | 2.13          | 0.912         | 2.03          |
| <b>6</b>          | 0.933         | 1.10          | 1.80          | 0             | 1.02          |
| <b>24</b>         | 0             | 0.875         | 1.14          | 0             | 0.438         |

217

218

219 By one hour post-administration, rapamycin concentrations increased for all four dogs  
220 (Figure 1), with the median rapamycin concentration one hour post-administration at 0.980 ng/ml  
221 (0.861 – 1.15). At two hours post-administration, concentrations ranged from 0.912 to 2.13  
222 ng/ml (median = 1.47). Following this two-hour time point, blood concentrations progressively  
223 decreased in all dogs, with the median rapamycin concentrations measured at six and 24 hours  
224 being 1.02 ng/ml (0.000 – 1.80) and 0.440 ng/ml (0.000 – 1.14). By six hours post-  
225 administration, dog #6 no longer had detectable rapamycin in circulation, and by 24 hours post-  
226 administration, dog #2 also no longer had detectable rapamycin in his blood.

227

228 **Figure 1: Blood concentration (ng/ml) of rapamycin in four dogs receiving long-term low-**  
229 **dose rapamycin therapy before (0), and 1, 2, 6, and 24 hours after oral administration.**

230

## 231 **Pharmacokinetic Parameters**

232 Estimates of pharmacokinetic parameters are presented in Table 3. For all dogs,  $T_{\max}$  was  
233 2 hours, and the median  $C_{\max}$  was 1.47 ng/ml (0.91 – 2.1). Due to the sparse sampling and lack of  
234 sufficient samples for accurate nonlinear regression of the terminal phase drug concentrations,  
235 apparent elimination half-life, AUC extrapolated to infinity, and AUMC extrapolated to infinity  
236 could not be calculated. Therefore, the only estimates related to elimination rate reported are for  
237 MRT. The median MRT was 6.8 hrs (1.3 – 10). The median  $AUC_{0-\text{last}}$  was 15.7 ng\*hr/mL (1.30  
238 – 36.3).

239

240 **Table 3: Pharmacokinetic parameters of rapamycin in four dogs following a 0.025 mg/kg**  
241 **oral dose.**

| <b>Dog#</b>                              | <b>Units</b>        | <b>2</b> | <b>3</b> | <b>4</b> | <b>6</b> | <b>Median</b> |
|------------------------------------------|---------------------|----------|----------|----------|----------|---------------|
| <b><math>T_{\max}</math></b>             | <b>hr</b>           | 2        | 2        | 2        | 2        | 2             |
| <b><math>C_{\max}</math></b>             | <b>ng/ml</b>        | 1.1      | 1.9      | 2.1      | 0.9      | 1.47          |
| <b><math>AUC_{0-\text{last}}</math></b>  | <b>hr*ng/ml</b>     | 5.6      | 25.8     | 36.3     | 1.3      | 15.7          |
| <b><math>AUMC_{0-\text{last}}</math></b> | <b>hr*ng* ng/ml</b> | 17.7     | 272.1    | 376.6    | 1.8      | 144.9         |
| <b><math>MRT_{\text{last}}</math></b>    | <b>hr</b>           | 3.1      | 10.6     | 10.4     | 1.3      | 6.8           |

242  $T_{\max}$ : time of maximum observed blood concentration;  $C_{\max}$ : maximum observed blood  
243 concentration;  $AUC_{0-\text{last}}$ : area of the curve from time zero to last measurable time;  $AUMC_{0-\text{last}}$ :  
244 area under the moment curve from time zero to last measurable time;  $MRT_{\text{last}}$ : mean residence  
245 time calculated from  $AUMC_{0-\text{last}} / AUC_{0-\text{last}}$ .  
246

## 247 **Discussion**

248 The results of this study indicate that low-dose (0.025 mg/kg, three times per week for  
249 one to five months) oral rapamycin, administered to healthy, middle-aged dogs, resulted in low  
250 but measurable concentrations of rapamycin in the blood. Similar concentrations have resulted in  
251 reduced mTOR activity in canine tumor cells.[52] Though rapamycin has previously been  
252 administered to dogs in other studies, this study is unique in the duration of treatment with a  
253 lower dose than previously described. Prior to this report, the longest published study of  
254 rapamycin in companion dogs was 10 weeks (2.5 months), during which Urfer *et al.* employed a  
255 dosing schedule of three days a week, on Monday, Wednesday, and Friday mornings. However,  
256 the doses used in that study were higher (either 0.05 mg/kg or 0.1 mg/kg). Additionally, no  
257 analysis of drug concentrations was performed. [33] Larson, *et al* [51] described  
258 pharmacokinetic analysis of oral rapamycin in companion dogs treated with 0.1 mg/kg  
259 administered either once or on five consecutive days. By comparison, the lower-dose, three-day-  
260 a-week regimen utilized in this study is markedly different. This three-times-weekly dosing  
261 schedule is intended to be employed in a nationwide study, with a much larger cohort of dogs  
262 who will receive rapamycin for three years. Because of this, investigation into the  
263 pharmacokinetics of rapamycin administration using this novel dosing schedule was warranted.

264 Not surprisingly, some of the pharmacokinetic parameters obtained from this study  
265 differed from those obtained by Larson, *et al.*[51] In the current study, the median  $C_{\max}$  was 1.47  
266 ng/ml, with the highest rapamycin blood concentration measured being 2.13 ng/ml. By contrast,

267 maximum blood concentrations following a 0.1 mg/kg oral dose of rapamycin were greater, with  
268 a single oral dose or five consecutive daily doses resulting in mean concentrations of 8.39 ng/ml  
269 and 5.49 ng/ml, respectively.[51] On the other hand, despite administering rapamycin via  
270 intramuscular injections rather than orally, Paoloni *et al.* reported a similar  $C_{\max}$  to this study  
271 (median: 1.69 ng/ml, range: 1.21-1.82 ng/ml) in dogs receiving a 0.02 mg/kg dose on eight  
272 consecutive days.[52] This might indicate that in dogs, maximum blood concentrations of  
273 rapamycin are more affected by the dose utilized, rather than the frequency or route of  
274 administration. The median  $C_{\max}$  in this study is significantly lower than that considered  
275 therapeutic for preventing organ transplant rejection in humans, where a blood concentration of  
276 8-15 ng/ml is often desired.[14, 53] This is intentional, as our goal was to use a dose that results  
277 in measurable blood concentrations, but not with the objective of causing immunosuppression.  
278 The  $T_{\max}$  reported in our study (two hours) is more similar to that reported by Larson *et al.* ( $3.3 \pm$   
279  $2.5$  hours after one dose, and  $4.5 \pm 1.0$  hours after five consecutive doses) compared to that  
280 observed after intramuscular (IM) injection (up to 48 hours), indicating faster absorption with  
281 oral administration.[51, 52]

282 The median MRT was 6.8 hours. Because AUC could not be extrapolated to infinity  
283 using regression analysis, it is difficult to assess the sufficiency of sampling times. Typically,  
284 one would look at area under the curve extrapolated from time zero to infinity as a percent of  
285 total AUC to evaluate whether samples were collected for long enough after drug dosing, but  
286 there were not enough non-zero sampling times after  $C_{\max}$  to regress appropriately. Due to this,  
287  $T_{1/2}$  was unable to be directly calculated, and MRT was reported.

288 In a previous study utilizing rapamycin, a mean half-life of 38.7 hours was found by  
289 Larson *et al.* following a single dose of 0.1 mg/kg orally. This was far lower than the  $T_{1/2}$  of 99

290 hours observed following five consecutive 0.1 mg/kg oral doses in that same study.[51]. It  
291 should be noted that, similar to the variable  $T_{1/2}$  calculated amongst drug recipients in both  
292 previous canine rapamycin pharmacokinetic studies (oral and IM administration), our MRT was  
293 not consistent between recipients. While two of the four dogs had an estimated MRT within 0.2  
294 hours (10.4 & 10.6 hrs), the MRT of the other two dogs was significantly less (3.1 & 1.3  
295 hrs).[51, 52] Whether the MRT calculated in this study is due to the low rapamycin dose utilized,  
296 the intermittent dosing schedule, the duration of administration, or a combination of these  
297 factors, is unknown. Additionally, because none of our dogs had measurable levels of rapamycin  
298 in their blood after 48 hours (that is, at time zero in our study), this may indicate that our dosing  
299 regimen was more akin to intermittent pulse-therapy as opposed to a long-term, continuous  
300 treatment. At this time, the benefit or significance of this is unknown.

301 This study is not without limitations. All four dogs utilized were already participating in a  
302 12-month prospective study investigating rapamycin administration, and therefore, the duration  
303 of treatment prior to pharmacokinetic analysis was variable. Additionally, the sample size is  
304 small, attributable to the strict standards dogs must have met to be enrolled in the previously  
305 mentioned study, the duration of therapy, and the fact that three out of seven initially tested dogs  
306 were revealed to be receiving a placebo once the trial was unblinded. Blood samples were  
307 transferred to blood spot cards and then stored at  $-80^{\circ}\text{C}$  for multiple months prior to analysis,  
308 which could possibly have impacted the reported rapamycin concentrations. However, blood  
309 spot cards are a highly stable form of storage, with some studies utilizing cards stored for over a  
310 decade.[54] In regard to the analysis, measurements below 1 ng/ml were obtained and reported,  
311 despite the fact that these measurements fall below the formal limit of detection for the assay,  
312 which is a statistical bound on confidence that the measured value is different from zero. We feel

313 comfortable including these low measurements because all of the dogs receiving rapamycin had  
314 positive measurement values, while none of the dogs receiving placebo had non-zero  
315 measurement values for any of the timepoints. We recognize, however, that the low measured  
316 values may contribute increased variance and higher error.

317 Finally, even though all dogs were offered food with their treatment administration, only  
318 one dog (#4) ate. Coincidentally, or perhaps consequently, this participant also had the highest  
319 blood levels of rapamycin and longest blood half-life. Rapamycin pharmacokinetics in humans  
320 have previously been shown to be impacted by the consumption of food, with a high-fat meal  
321 resulting in reductions in  $C_{max}$  but increases in AUC by 23 to 35%.[49] This, however, has not  
322 been investigated in dogs.[49] Given this, future investigation into whether food consumption  
323 does affect rapamycin absorption in dogs would be valuable, as this might influence the protocol  
324 of the upcoming long-term low-dose study, and other uses of rapamycin in this species, by  
325 recommending treatment administration at a specified time relative to a meal.

326

## 327 **Conclusions**

328 The results of this study indicate that low-dose (0.025 mg/kg) oral rapamycin, administered three  
329 times a week for one to five months to healthy, middle-aged large breed dogs, resulted in  
330 detectable concentrations of rapamycin in four dogs that was measurable in ng/ml. While the  
331 long-term benefits and ideal dosing schedule of rapamycin are still not known, this study  
332 demonstrates that low doses produce notable systemic exposure and that intermittent treatment  
333 may allow clearance of rapamycin from blood prior to the next dose.

334

## 335 **Author Contributions**



336 Conceptualization – Daniel E.L. Promislow, Matt Kaeberlein, and Kate E. Creevy  
337 Funding Acquisition – Daniel E.L. Promislow, Matt Kaeberlein, and Kate E. Creevy  
338 Investigation – Jeremy B. Evans and Ashley J Morrison  
339 Methodology – Daniel E.L. Promislow, Matt Kaeberlein, and Kate E. Creevy  
340 Project Administration – Kate E. Creevy  
341 Resources – Kate E. Creevy, Marisa Lopez-Cruzan, and Martin A. Javors  
342 Validation – Marisa Lopez-Cruzan and Martin A. Javors  
343 Writing – Original Draft Preparation - Jeremy B. Evans and Ashley J Morrison  
344 Writing – Review & Editing - Daniel E.L. Promislow, Matt Kaeberlein, Kate E. Creevy, Marisa  
345 Lopez-Cruzan, and Martin A. Javors

346

## 347 **Acknowledgments**

348 This research was supported by the William H. Donner Foundation and by grant U19AG057377  
349 from the National Institutes on Aging. We are also grateful for the assistance of Drs. Virginia  
350 Fajt and Madeline Droog with the PK analysis. The content is solely the responsibility of the  
351 authors and does not necessarily represent the official views of either funding body. Funding  
352 sources did not have any involvement in the study design, data analysis and interpretation, or  
353 writing and publication of the manuscript.

354

## 355 **Conflicts of Interest**

356 The authors of this manuscript report no conflicts of interest.

357

## 358 **References**

- 359 1. Ballou LM, Lin RZ. Rapamycin and mTOR kinase inhibitors. *J Chem Biol.* 2008;1(1-  
360 4):27-36.
- 361 2. Sarbassov DD, Ali SM, Sengupta S, Sheen JH, Hsu PP, Bagley AF, et al. Prolonged  
362 rapamycin treatment inhibits mTORC2 assembly and Akt/PKB. *Mol Cell.* 2006;22(2):159-  
363 68.
- 364 3. Sarbassov DD, Ali SM, Kim DH, Guertin DA, Latek RR, Erdjument-Bromage H, et al.  
365 Rictor, a novel binding partner of mTOR, defines a rapamycin-insensitive and raptor-  
366 independent pathway that regulates the cytoskeleton. *Curr Biol.* 2004;14(14):1296-302.
- 367 4. Zhang C, Liu A, Su G, Chen Y. Effect of rapamycin on the level of autophagy in rats  
368 with early heart failure. *J Cell Biochem.* 2019;120(3):4065-70.
- 369 5. Ehninger D, Neff F, Xie K. Longevity, aging and rapamycin. *Cell Mol Life Sci.*  
370 2014;71(22):4325-46.
- 371 6. Kapahi P, Chen D, Rogers AN, Katewa SD, Li PW, Thomas EL, et al. With TOR, less is  
372 more: a key role for the conserved nutrient-sensing TOR pathway in aging. *Cell Metab.*  
373 2010;11(6):453-65.
- 374 7. Blenis J. TOR, the Gateway to Cellular Metabolism, Cell Growth, and Disease. *Cell.*  
375 2017;171(1):10-3.
- 376 8. Blagosklonny MV. Rapamycin-induced glucose intolerance: hunger or starvation  
377 diabetes. *Cell Cycle.* 2011;10(24):4217-24.
- 378 9. Saxton RA, Sabatini DM. mTOR Signaling in Growth, Metabolism, and Disease. *Cell.*  
379 2017;168(6):960-76.
- 380 10. Martin DE, Hall MN. The expanding TOR signaling network. *Current opinion in cell*  
381 *biology.* 2005;17(2):158-66.
- 382 11. Lee MB, Carr DT, Kiflezghi MG, Zhao YT, Kim DB, Thon S, et al. A system to identify  
383 inhibitors of mTOR signaling using high-resolution growth analysis in *Saccharomyces*  
384 *cerevisiae*. *Geroscience.* 2017;39(4):419-28.
- 385 12. Hidalgo M, Rowinsky EK. The rapamycin-sensitive signal transduction pathway as a  
386 target for cancer therapy. *Oncogene.* 2000;19(56):6680-6.
- 387 13. Hashemolhosseini S, Nagamine Y, Morley SJ, Desrivieres S, Mercep L, Ferrari S.  
388 Rapamycin inhibition of the G1 to S transition is mediated by effects on cyclin D1 mRNA  
389 and protein stability. *J Biol Chem.* 1998;273(23):14424-9.

- 390 14. Morath C, Arns W, Schwenger V, Mehrabi A, Fonouni H, Schmidt J, et al. Sirolimus in  
391 renal transplantation. *Nephrol Dial Transplant*. 2007;22 Suppl 8:viii61-viii5.
- 392 15. Badve SV, Pascoe EM, Burke M, Clayton PA, Campbell SB, Hawley CM, et al.  
393 Mammalian Target of Rapamycin Inhibitors and Clinical Outcomes in Adult Kidney  
394 Transplant Recipients. *Clin J Am Soc Nephrol*. 2016;11(10):1845-55.
- 395 16. Johnston O, Rose CL, Webster AC, Gill JS. Sirolimus is associated with new-onset  
396 diabetes in kidney transplant recipients. *J Am Soc Nephrol*. 2008;19(7):1411-8.
- 397 17. Di Paolo S, Teutonico A, Leogrande D, Capobianco C, Schena PF. Chronic inhibition of  
398 mammalian target of rapamycin signaling downregulates insulin receptor substrates 1 and 2  
399 and AKT activation: A crossroad between cancer and diabetes? *J Am Soc Nephrol*.  
400 2006;17(8):2236-44.
- 401 18. Khan KH, Wong M, Rihawi K, Bodla S, Morganstein D, Banerji U, et al. Hyperglycemia  
402 and Phosphatidylinositol 3-Kinase/Protein Kinase B/Mammalian Target of Rapamycin  
403 (PI3K/AKT/mTOR) Inhibitors in Phase I Trials: Incidence, Predictive Factors, and  
404 Management. *Oncologist*. 2016;21(7):855-60.
- 405 19. Anisimov VN, Zabezhinski MA, Popovich IG, Piskunova TS, Semenchenko AV, Tyndyk  
406 ML, et al. Rapamycin increases lifespan and inhibits spontaneous tumorigenesis in inbred  
407 female mice. *Cell Cycle*. 2011;10(24):4230-6.
- 408 20. Zhang Y, Bokov A, Gelfond J, Soto V, Ikeno Y, Hubbard G, et al. Rapamycin extends  
409 life and health in C57BL/6 mice. *J Gerontol A Biol Sci Med Sci*. 2014;69(2):119-30.
- 410 21. Halloran J, Hussong SA, Burbank R, Podlutskaya N, Fischer KE, Sloane LB, et al.  
411 Chronic inhibition of mammalian target of rapamycin by rapamycin modulates cognitive and  
412 non-cognitive components of behavior throughout lifespan in mice. *Neuroscience*.  
413 2012;223:102-13.
- 414 22. Majumder S, Caccamo A, Medina DX, Benavides AD, Javors MA, Kraig E, et al.  
415 Lifelong rapamycin administration ameliorates age-dependent cognitive deficits by reducing  
416 IL-1beta and enhancing NMDA signaling. *Aging Cell*. 2012;11(2):326-35.
- 417 23. Chiao YA, Kolwicz SC, Basisty N, Gagnidze A, Zhang J, Gu H, et al. Rapamycin  
418 transiently induces mitochondrial remodeling to reprogram energy metabolism in old hearts.  
419 *Aging (Albany NY)*. 2016;8(2):314-27.
- 420 24. Dai DF, Karunadharma PP, Chiao YA, Basisty N, Crispin D, Hsieh EJ, et al. Altered  
421 proteome turnover and remodeling by short-term caloric restriction or rapamycin rejuvenate  
422 the aging heart. *Aging Cell*. 2014;13(3):529-39.
- 423 25. Flynn JM, O'Leary MN, Zambataro CA, Academia EC, Presley MP, Garrett BJ, et al.  
424 Late-life rapamycin treatment reverses age-related heart dysfunction. *Aging Cell*.  
425 2013;12(5):851-62.

- 426 26. Chen C, Liu Y, Zheng P. mTOR regulation and therapeutic rejuvenation of aging  
427 hematopoietic stem cells. *Sci Signal*. 2009;2(98):ra75.
- 428 27. Shavlakadze T, Zhu J, Wang S, Zhou W, Morin B, Egerman MA, et al. Short-term Low-  
429 Dose mTORC1 Inhibition in Aged Rats Counter-Regulates Age-Related Gene Changes and  
430 Blocks Age-Related Kidney Pathology. *J Gerontol A Biol Sci Med Sci*. 2018;73(7):845-52.
- 431 28. An JY, Kerns KA, Ouellette A, Robinson L, Morris HD, Kaczorowski C, et al.  
432 Rapamycin rejuvenates oral health in aging mice. *eLife*. 2020;9.
- 433 29. An JY, Quarles EK, Mekvanich S, Kang A, Liu A, Santos D, et al. Rapamycin treatment  
434 attenuates age-associated periodontitis in mice. *Geroscience*. 2017;39(4):457-63.
- 435 30. Bitto A, Ito TK, Pineda VV, LeTexier NJ, Huang HZ, Sutlief E, et al. Transient  
436 rapamycin treatment can increase lifespan and healthspan in middle-aged mice. *eLife*.  
437 2016;5:e16351.
- 438 31. Yilmaz OH, Katajisto P, Lamming DW, Gultekin Y, Bauer-Rowe KE, Sengupta S, et al.  
439 mTORC1 in the Paneth cell niche couples intestinal stem-cell function to calorie intake.  
440 *Nature*. 2012;486(7404):490-5.
- 441 32. Garcia DN, Saccon TD, Pradiee J, Rincon JAA, Andrade KRS, Rovani MT, et al. Effect  
442 of caloric restriction and rapamycin on ovarian aging in mice. *Geroscience*. 2019;41(4):395-  
443 408.
- 444 33. Urfer SR, Kaeberlein TL, Mailheau S, Bergman PJ, Creevy KE, Promislow DEL, et al. A  
445 randomized controlled trial to establish effects of short-term rapamycin treatment in 24  
446 middle-aged companion dogs. *Geroscience*. 2017;39(2):117-27.
- 447 34. Ramos FJ, Chen SC, Garelick MG, Dai DF, Liao CY, Schreiber KH, et al. Rapamycin  
448 reverses elevated mTORC1 signaling in lamin A/C-deficient mice, rescues cardiac and  
449 skeletal muscle function, and extends survival. *Sci Transl Med*. 2012;4(144):144ra03.
- 450 35. Yi H, Brooks ED, Thurberg BL, Fyfe JC, Kishnani PS, Sun B. Correction of glycogen  
451 storage disease type III with rapamycin in a canine model. *J Mol Med (Berl)*.  
452 2014;92(6):641-50.
- 453 36. Ruygrok PN, Muller DW, Serruys PW. Rapamycin in cardiovascular medicine. *Internal  
454 Medicine Journal*. 2003;33(3):103-9.
- 455 37. Powers RW, 3rd, Kaeberlein M, Caldwell SD, Kennedy BK, Fields S. Extension of  
456 chronological life span in yeast by decreased TOR pathway signaling. *Genes Dev*.  
457 2006;20(2):174-84.
- 458 38. Bjedov I, Toivonen JM, Kerr F, Slack C, Jacobson J, Foley A, et al. Mechanisms of life  
459 span extension by rapamycin in the fruit fly *Drosophila melanogaster*. *Cell Metab*.  
460 2010;11(1):35-46.

- 461 39. Robida-Stubbs S, Glover-Cutter K, Lamming DW, Mizunuma M, Narasimhan SD,  
462 Neumann-Haefelin E, et al. TOR signaling and rapamycin influence longevity by regulating  
463 SKN-1/Nrf and DAF-16/FoxO. *Cell Metab.* 2012;15(5):713-24.
- 464 40. Anisimov VN, Zabezhinski MA, Popovich IG, Piskunova TS, Semchenko AV, Tyndyk  
465 ML, et al. Rapamycin extends maximal lifespan in cancer-prone mice. *Am J Pathol.*  
466 2010;176(5):2092-7.
- 467 41. Bitto A, Ito TK, Pineda VV, LeTexier NJ, Huang HZ, Sutlief E, et al. Transient  
468 rapamycin treatment can increase lifespan and healthspan in middle-aged mice. *Elife.* 2016;5.
- 469 42. Harrison DE, Strong R, Sharp ZD, Nelson JF, Astle CM, Flurkey K, et al. Rapamycin fed  
470 late in life extends lifespan in genetically heterogeneous mice. *Nature.* 2009;460(7253):392-  
471 5.
- 472 43. Wilkinson JE, Burmeister L, Brooks SV, Chan CC, Friedline S, Harrison DE, et al.  
473 Rapamycin slows aging in mice. *Aging Cell.* 2012;11(4):675-82.
- 474 44. Miller RA, Harrison DE, Astle CM, Baur JA, Boyd AR, de Cabo R, et al. Rapamycin, but  
475 not resveratrol or simvastatin, extends life span of genetically heterogeneous mice. *J*  
476 *Gerontol A Biol Sci Med Sci.* 2011;66(2):191-201.
- 477 45. Miller RA, Harrison DE, Astle CM, Fernandez E, Flurkey K, Han M, et al. Rapamycin-  
478 mediated lifespan increase in mice is dose and sex dependent and metabolically distinct from  
479 dietary restriction. *Aging Cell.* 2014;13(3):468-77.
- 480 46. Kaeberlein M, Kennedy BK. Ageing: A midlife longevity drug? *Nature.*  
481 2009;460(7253):331-2.
- 482 47. Zimmerman JJ, Kahan BD. Pharmacokinetics of sirolimus in stable renal transplant  
483 patients after multiple oral dose administration. *J Clin Pharmacol.* 1997;37(5):405-15.
- 484 48. MacDonald A, Scarola J, Burke JT, Zimmerman JJ. Clinical pharmacokinetics and  
485 therapeutic drug monitoring of sirolimus. *Clin Ther.* 2000;22 Suppl B:B101-21.
- 486 49. Zimmerman JJ, Ferron GM, Lim HK, Parker V. The effect of a high-fat meal on the oral  
487 bioavailability of the immunosuppressant sirolimus (rapamycin). *J Clin Pharmacol.*  
488 1999;39(11):1155-61.
- 489 50. Trepanier DJ, Gallant H, Legatt DF, Yatscoff RW. Rapamycin: distribution,  
490 pharmacokinetics and therapeutic range investigations: an update. *Clin Biochem.*  
491 1998;31(5):345-51.
- 492 51. Larson JC, Allstadt SD, Fan TM, Khanna C, Lunghofer PJ, Hansen RJ, et al.  
493 Pharmacokinetics of orally administered low-dose rapamycin in healthy dogs. *Am J Vet Res.*  
494 2016;77(1):65-71.

- 495 52. Paoloni MC, Mazcko C, Fox E, Fan T, Lana S, Kisseberth W, et al. Rapamycin  
496 pharmacokinetic and pharmacodynamic relationships in osteosarcoma: a comparative  
497 oncology study in dogs. PLoS One. 2010;5(6):e11013.
- 498 53. Kahan BD. Two-year results of multicenter phase III trials on the effect of the addition of  
499 sirolimus to Cyclosporine-based immunosuppressive regimens in renal transplantation.  
500 Transplantation Proceedings. 2003;35(3):S37-S51.
- 501 54. Torok D, Muhl A, Votava F, Heinze G, Solyom J, Crone J, et al. Stability of 17a-  
502 hydroxyprogesterone in dried blood spots after autoclaving and prolonged storage. Clin  
503 Chem. 2002;48:370-2.  
504

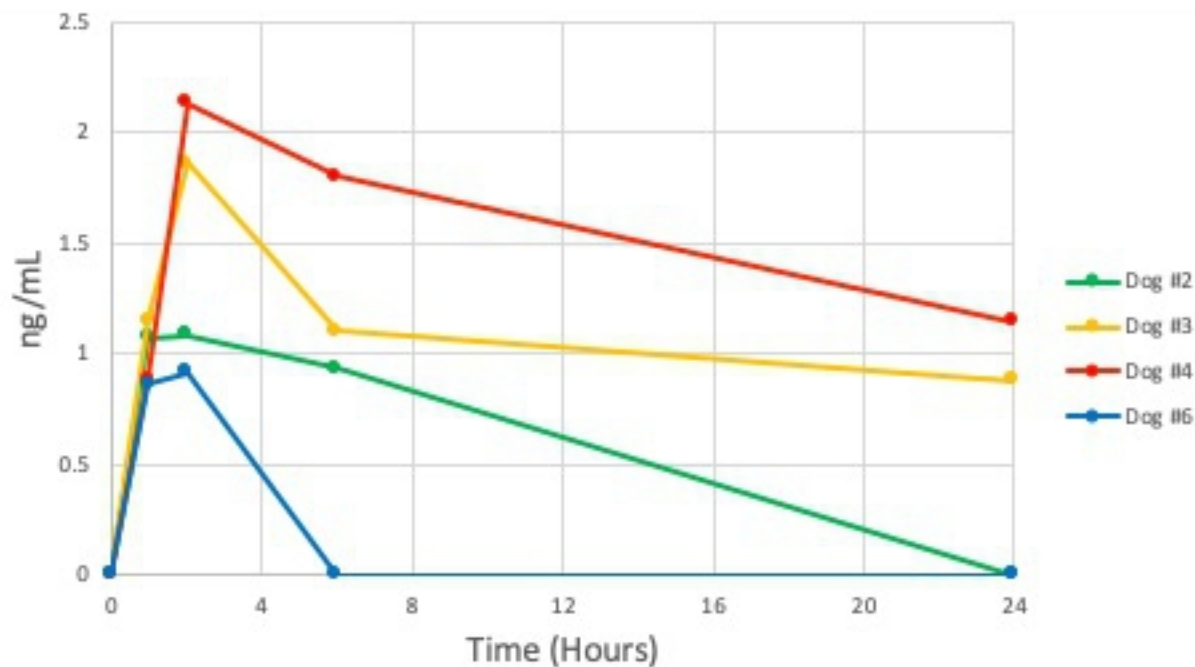

Figure 1
